# Supplementary material
Source: PubMed Central journal article supplement (PMC7112350)
Supplement: mmc1.pdf [file mmc1.pdf]

# Endothelial Cells Are Central Orchestrators of Cytokine Amplification during Influenza Virus Infection

John R. Teijaro,<sup>1,5</sup> Kevin B. Walsh,<sup>1,5</sup> Stuart Cahalan,<sup>2</sup> Daniel M. Fremgen,<sup>1</sup> Edward Roberts,<sup>3</sup> Fiona Scott,<sup>4</sup> Esther Martinborough,<sup>4</sup> Robert Peach,<sup>4</sup> Michael B.A. Oldstone,<sup>1,\*</sup> and Hugh Rosen<sup>2,\*</sup>

<sup>1</sup>Department of Immunology and Microbial Science

<sup>2</sup>Department of Chemical Physiology

<sup>3</sup>Department of Chemistry

The Scripps Research Institute, La Jolla, CA 92037, USA

<sup>4</sup>Receptos, Inc., La Jolla, CA 92037, USA

<sup>5</sup>These authors contributed equally to this work

\*Correspondence: mbaobo@scripps.edu (M.B.A.O.), hrosen@scripps.edu (H.R.)

DOI 10.1016/j.cell.2011.08.015

## SUMMARY

Cytokine storm during viral infection is a prospective predictor of morbidity and mortality, yet the cellular sources remain undefined. Here, using genetic and chemical tools to probe functions of the S1P<sub>1</sub> receptor, we elucidate cellular and signaling mechanisms that are important in initiating cytokine storm. Whereas S1P<sub>1</sub> receptor is expressed on endothelial cells and lymphocytes within lung tissue, S1P<sub>1</sub> agonism suppresses cytokines and innate immune cell recruitment in wild-type and lymphocyte-deficient mice, identifying endothelial cells as central regulators of cytokine storm. Furthermore, our data reveal immune cell infiltration and cytokine production as distinct events that are both orchestrated by endothelial cells. Moreover, we demonstrate that suppression of early innate immune responses through S1P<sub>1</sub> signaling results in reduced mortality during infection with a human pathogenic strain of influenza virus. Modulation of endothelium with a specific agonist suggests that diseases in which amplification of cytokine storm is a significant pathological component could be chemically tractable.

## INTRODUCTION

Morbidity and mortality caused by severe influenza infections reflect properties that are intrinsic to the virus strain, including replication potential, receptor usage, and cytopathic effects on pulmonary epithelial cells (García-Sastre, 2010; Tscherne and García-Sastre, 2011). In addition to viral-intrinsic factors, host-specific traits such as divergent susceptibilities to infection as well as differences in host immune responses may ameliorate or exacerbate both infection and clinical outcome. An overly aggressive innate response, with early recruitment of inflamma-

tory leukocytes to the lung, was a key contributor to the morbidity of the 1918 influenza infection (Kobasa et al., 2007). More recent clinical literature on avian H5N1 infection documented a significant association between excessive early cytokine responses, immune cell recruitment, and poor outcome (de Jong et al., 2006). Public health approaches to influenza pandemics have relied primarily on preventative vaccine strategies and supportive measures, including the use of antiviral therapies. Nevertheless, the speed at which the 2009 H1N1 influenza virus swine pandemic spread during the lag of vaccine availability highlighted the need to identify additional mechanisms for amelioration of influenza virus infection (Openshaw and Dunning, 2010). Antiviral drugs inhibiting virus replication may select for mutational escape, rendering the therapy ineffective. Modulation of the host immune response has the potential advantage of exerting less-selective pressure on viral populations. Though the prospect of blunting cytokine storm is enticing, a major limitation to treating diseases in which cytokine storm contributes to pathogenesis is the limited understanding of the cellular triggers of this process. Thus, we sought to define cellular signaling pathways that are chemically tractable to test the hypothesis that modulating cytokine storm would provide insight into influenza pathogenesis, with potential therapeutic implications.

Chemical modulators of the sphingosine-1-phosphate (S1P) signaling system have provided insight into immune cell trafficking and immune responses (Rivera et al., 2008; Rosen et al., 2009). Due to the immunomodulatory properties of S1P receptor signaling, chemical agonists have been used successfully for the treatment of relapsing and remitting multiple sclerosis (Brinkmann et al., 2010). Though the systems biology of the S1P receptors is complex, with five receptor subtypes, differential expression, coupling, attenuation, and catabolism (Rosen and Liao, 2003), the availability of selective chemical probes together with mouse genetic models allows detailed insights into immunopathogenesis. We previously showed that a non-selective S1P receptor agonist inhibited cytokine storm, dendritic cell migration, and subsequent antigen-specific T cell

proliferation, protecting the lung tissue from host-mediated injury. Alleviation of immunopathology by the nonselective S1P receptor agonist did not affect virus clearance nor the production of neutralizing antibodies, demonstrating that, although cytokine storm was diminished, retention of a sufficient cellular and humoral immune response, as well as long-term protective immunity, still occurs (Marsolais et al., 2008; Marsolais et al., 2009).

Here, through the use of an S1P<sub>1</sub> receptor subtype-selective agonist as well as genetic and biochemical tools, we define a crucial endothelial signaling loop that is important for the initiation of cytokine storm. We reveal that cytokine secretion and immune cell infiltration are separable events that are both regulated by the pulmonary endothelium. Further, we demonstrate that suppression of early innate immune responses through S1P<sub>1</sub> signaling results in reduced mortality during human pathogenic influenza virus challenge. Thus, S1P<sub>1</sub> receptor signaling in endothelium provides a mechanism for attenuation of influenza virus-induced morbidity and reveals an unexpected role for endothelial cells as regulators of cytokine storm.

## RESULTS

### Administration of an S1P<sub>1</sub> Agonist Blunts Cytokine Storm

Previously, we reported that treatment of influenza virus-infected mice with AAL-R, a promiscuous S1P receptor agonist for S1P<sub>1</sub> and S1P<sub>3-5</sub> receptors, inhibits early proinflammatory cytokine expression and innate immune cell accumulation within the lung (Marsolais et al., 2008; Marsolais et al., 2009). To assess the contribution of S1P<sub>1</sub> receptor signaling in inhibition of influenza virus-induced early inflammation, infected mice were treated with the S1P<sub>1</sub> receptor-specific agonist CYM-5442 (Gonzalez-Cabrera et al., 2008). Treatment with 2 mg/kg of CYM-5442 twice daily significantly inhibited secretion of cytokines and chemokines associated with influenza virus-induced pathology, including IFN- $\alpha$ , CCL2, IL-6, TNF- $\alpha$ , and IFN- $\gamma$  (Figure 1A) in addition to CCL3, CCL5, CXCL2, and IL-1 $\alpha$  (Figure S1A), compared to vehicle-treated mice 48 hr postinfection. CYM-5442 reduction of IFN- $\alpha$ , CCL2, CCL3, CCL5, IL-1 $\alpha$ , and IL-6 expression was as complete as treatment with the promiscuous agonist; however, it was not as effective as AAL-R in suppressing CXCL2, TNF- $\alpha$ , and IFN- $\gamma$  (Figure 1A and Figure S1A), suggesting a role for other S1P receptors in modulating those cytokines. In addition to inhibiting cytokine/chemokine production, AAL-R and CYM-5442 administration to influenza virus-infected mice blunted the accumulation of innate inflammatory infiltrate characterized as macrophages/monocytes (CD11b<sup>+</sup>, F480<sup>+</sup>, Ly6G<sup>-</sup>), neutrophils (CD11b<sup>+</sup>, Ly6G<sup>+</sup>, F480<sup>-</sup>), and NK cells (NK1.1<sup>+</sup>, CD3<sup>-</sup>), although AAL-R was more effective at inhibiting macrophage/monocyte and NK cell accumulation in the lung (Figure 1B). We also observed significantly reduced CD69 expression on macrophage/monocytes and NK cells following treatment with either CYM-5442 or AAL-R 48 hr postinfection, demonstrating diminished cell activation (Figures 1C and 1D). Despite significant blunting of innate immune cell recruitment and cytokine/chemokine responses, we observed no differences in viral titers following AAL-R or CYM-5442 treatment compared

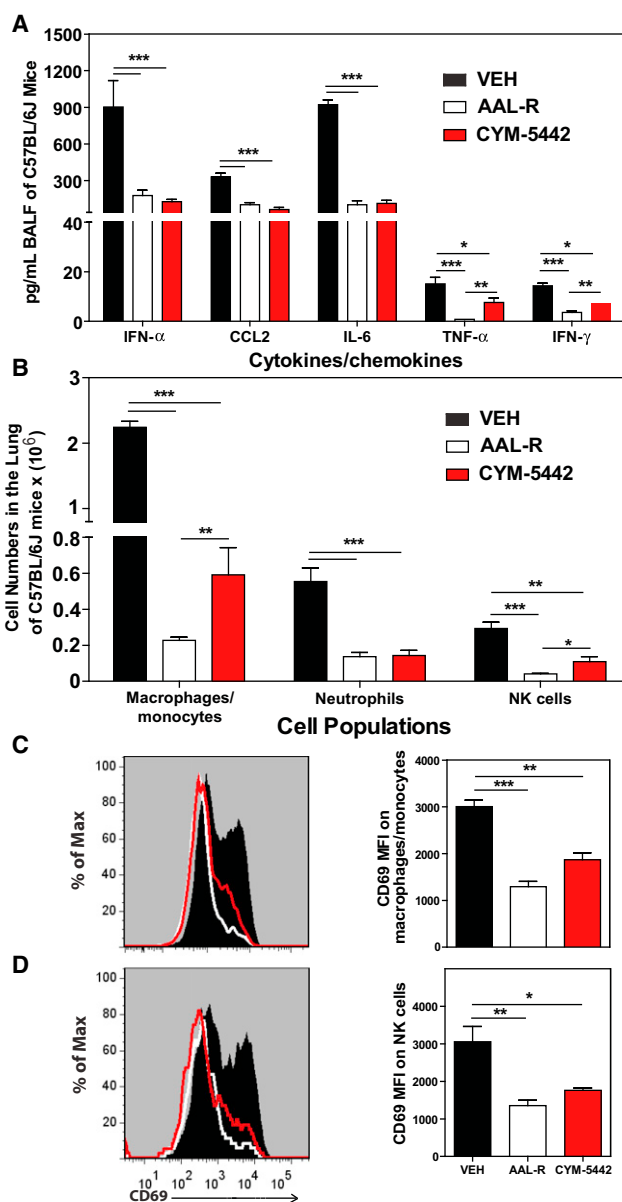

**Figure 1. S1P<sub>1</sub> Receptor Agonism Suppresses Early Proinflammatory Cytokine and Chemokine Production and Innate Immune Cell Recruitment during Influenza Virus Infection**

Mice were infected with  $1 \times 10^4$  PFU WSN influenza virus, and vehicle (water), AAL-R (0.2 mg/kg) (1 hr postinfection), or CYM-5442 (2 mg/kg) (1, 13, 25, and 37 hr postinfection) were administered i.t. to mice.

(A) Proinflammatory cytokines and chemokines were measured 48 hr postinfection in BALF by ELISA.

(B) Total numbers of innate immune cells were quantified from collagenase-digested lungs by flow cytometry at 48 hr postinfluenza virus infection.

(C) Histograms (left) and mean fluorescent intensity (MFI) (right) of CD69 expression on macrophages was quantified on vehicle, AAL-R-, or CYM-5442-treated mice 48 hr postinfluenza virus infection by flow cytometry staining.

(D) Histograms (left) and MFI (right) of NK cell CD69 expression quantified as in (C).

Data represent average  $\pm$  SEM from four to mice per group. \* $p < 0.05$ ; \*\* $p < 0.005$ ; \*\*\* $p < 0.0005$ . Results are representative of greater than six independent experiments. See also Figure S1 and Figure S2.

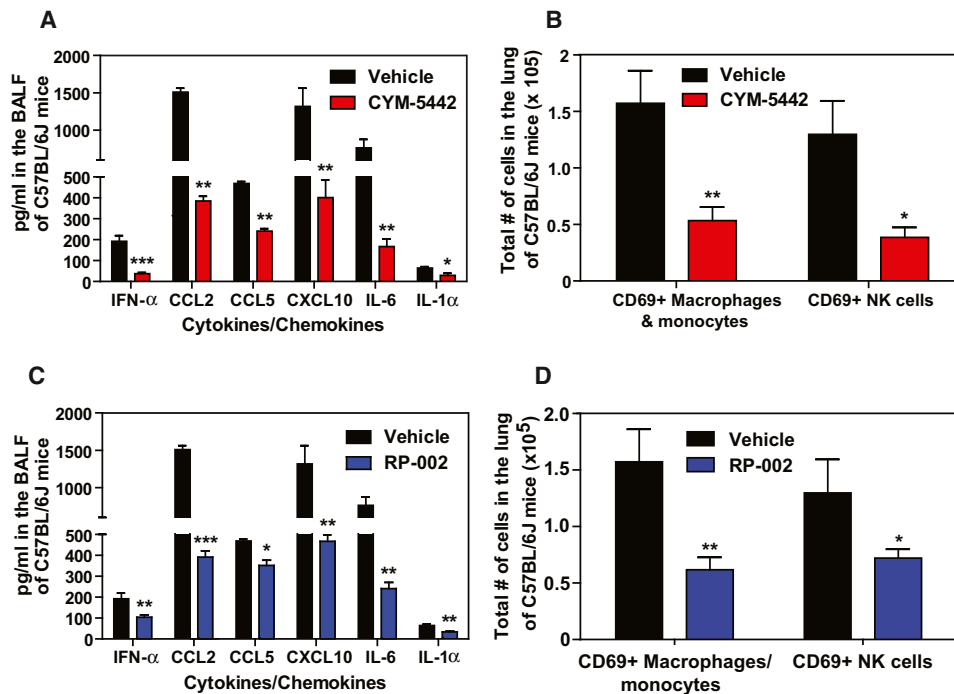

**Figure 2. S1P<sub>1</sub> Receptor Agonism Suppresses Early Proinflammatory Cytokine and Chemokine Production and Recruitment of Activated Innate Immune Cells during Human Pathogenic H1N1:2009 Swine Influenza Virus Infection**

(A–D) Mice were infected with  $1 \times 10^5$  PFU A/Wisconsin/WSLH34939/09 influenza virus, and either vehicle (water), CYM-5442 (2 mg/kg) (1, 13, 25, and 37 hr postinfection), or RP-002 (2 mg/kg on 1 and 25 hr postinfection) were administered i.t. to mice. Proinflammatory cytokines and chemokines were measured 48 hr postinfection in BALF by ELISA in either CYM-5442- (A) or RP-002-treated mice (C). Total numbers of innate immune cells were quantified from collagenase-digested lungs by flow cytometry at 48 hr postinfluenza virus infection in mice treated with either CYM-5442 (B) or RP-002 (D). Data represent average  $\pm$  SEM from four to five mice per group. \* $p < 0.05$ ; \*\* $p < 0.005$ ; \*\*\* $p < 0.0005$ . Results are representative of two independent experiments. See also Figure S3.

to vehicle-treated mice (Figure S2), demonstrating that S1P<sub>1</sub> agonism neither inhibits nor enhances viral replication. Collectively, these results reveal that activation of a single sphingosine-1-phosphate receptor, S1P<sub>1</sub>, is sufficient to blunt global innate inflammation following mouse-adapted influenza virus infection in mice.

We next asked whether S1P<sub>1</sub> receptor agonism could suppress early innate cytokine and chemokine responses following infection with a human pathogenic isolate of influenza virus. To test this, we infected mice with a virulent isolate of the 2009 H1N1 pandemic influenza virus that was isolated from a hospitalized patient and has never been passaged through mice (A/Wisconsin/WSLH34939/09) (Itoh et al., 2009). Infection of C57BL/6J mice with this strain causes severe disease, resulting in rapid mortality beginning between days 4 and 6 postinfection (data not shown). Similar to infection with mouse-adapted WSN influenza virus, treatment with CYM-5442 following infection with H1N1:2009 significantly suppressed cytokine and chemokine responses and the accumulation of activated innate immune cells 48 hr postinfection (Figures 2A and 2B). We also tested an additional S1P<sub>1</sub> receptor-selective agonist (RP-002) to provide support for S1P<sub>1</sub> receptor specificity and to show directly that S1P<sub>1</sub>-selective agonists share this modulation of innate immunopathology. We infected mice with H1N1:2009 pandemic influenza virus as above and treated mice with RP-002 at 1 and 25 hr postinfection. Similar to what we observed with

CYM-5442, RP-002 treatment significantly inhibited the production of multiple proinflammatory cytokine and chemokines (Figure 2C) and suppressed the accumulation of activated (CD69<sup>+</sup>) macrophages/monocytes and NK cells in the infected lung 48 hr postinfection (Figure 2D). Moreover, RP-002-mediated suppression of innate immune cell recruitment and cytokine/chemokine production occurred without altering lung viral titers (Figure S3), demonstrating that S1P<sub>1</sub> agonist-mediated suppression of cytokines and chemokines is not due to direct effects on influenza virus replication.

### S1P<sub>1</sub> Agonist-Mediated Suppression of Early Innate Immune Responses Results in Protection to Human Pathogenic Influenza Virus Challenge in Mice

Early dysregulated innate immune responses in the lung have been associated with morbidity and mortality during infection with highly pathogenic strains of influenza virus (Cillóniz et al., 2009; Kobasa et al., 2007). Therefore, we asked whether blunting early innate cytokine/chemokine responses using an S1P<sub>1</sub> agonist could protect mice from lethal infection with a virulent human isolate of pandemic 2009 H1N1 that had not been passaged in mice (A/Wisconsin/WSLH/34939/09). In order not to impose additional stress on the infected lung and because oral delivery is a popular route for drug administration, we orally administered the S1P<sub>1</sub> agonist, RP-002, at 6 mg/kg by gavage to C57BL/6J mice infected with  $1 \times 10^5$  PFU of

A/Wisconsin/WSLH/34939/09 at 1 and 25 hr postinfection. RP-002 significantly suppressed cytokine amplification (Figure 3A) as well as recruitment of myeloid cells to the infected lung, as measured by flow cytometry (Figure 3B).

Early administration of RP-002 resulted in enhanced survival time after lethal challenge with A/Wisconsin/WSLH/34939/09, with death initiating in vehicle-treated mice on day 6 postinfection compared to day 11 postinfection for RP-002-treated mice (Figure 3C,  $p < 0.005$ ). Moreover, RP-002 treatment resulted in significant improvement in overall survival compared to vehicle-treated mice (20% mortality in RP-002 versus 80% mortality for vehicle,  $p < 0.005$ ; Figure 3C). These findings demonstrate a significant biological phenotype resulting from early S1P<sub>1</sub> receptor agonist treatment following pathogenic influenza virus infection. By showing directly that aborting an early step in cytokine amplification significantly protects against an ordinarily lethal human pathogenic H1N1:2009 infection, the findings expand previous observations of an association between humans and animal models in which dysregulation of innate immune responses contributes to morbidity and mortality. Importantly, treatment with RP-002 ameliorated morbidity and mortality associated with human pathogenic H1N1:2009 severe influenza infection. Effects upon survival are in keeping with our previously published data (Marsolais et al., 2009) that this mechanism does not alter virus-specific neutralizing antibody response, affinity maturation, and class switching. This documents that the cytokine storm plays a direct and cardinal role in influenza-mediated lung disease. We then sought to delineate the mechanism of S1P<sub>1</sub> suppression of cytokine amplification.

### S1P<sub>1</sub> Is Expressed on Pulmonary Endothelium and Lymphocytes

To identify cells in the lung that express the S1P<sub>1</sub> receptor, we utilized an eGFP-S1P<sub>1</sub> receptor knockin mouse in which the native S1P<sub>1</sub> receptor was homologously replaced with a functional enhanced green fluorescent protein (eGFP)-tagged S1P<sub>1</sub> receptor (S1P<sub>1</sub>-eGFP) (Cahalan et al., 2011). This mouse model allowed direct detection of eGFP-S1P<sub>1</sub> receptor protein expression by flow cytometry, with additional biochemical confirmation using highly specific antibodies for GFP followed by western blotting that distinguishes the fused S1P<sub>1</sub>-eGFP receptor by specific molecular weight. High levels of S1P<sub>1</sub>-eGFP were detected on lung lymphatic (CD45<sup>-</sup>, CD31<sup>+</sup>, gp38<sup>+</sup>) and vascular (CD45<sup>-</sup>, CD31<sup>+</sup>, gp38<sup>-</sup>) endothelium, whereas pulmonary epithelium (CD45<sup>-</sup>, CD31<sup>-</sup>, EpCAM<sup>+</sup>) was negative for S1P<sub>1</sub>-eGFP (Figure 4A). As reported previously, CD4<sup>+</sup> T cells (CD4<sup>+</sup>, CD3<sup>+</sup>), CD8<sup>+</sup> T cells (CD4<sup>+</sup>, CD3<sup>+</sup>), and B cells (B220<sup>+</sup>, CD19<sup>+</sup>) expressed S1P<sub>1</sub>-eGFP (Figure 4B), whereas leukocytes, including macrophages/monocytes, a subset of alveolar macrophages (F480<sup>+</sup>, CD11c<sup>+</sup>, CD11b<sup>-</sup>), dendritic cells (CD11c<sup>+</sup>, I/A-I/E<sup>+</sup>, CD205<sup>+</sup>, F480<sup>-</sup>), neutrophils, NK cells (NK1.1<sup>+</sup>, CD3<sup>-</sup>), and innate lymphoid cells (Lin<sup>-</sup>Sca1<sup>+</sup>), expressed negligible levels of S1P<sub>1</sub>-eGFP (Figure 4C and data not shown). Cells from uninfected mice expressed similar levels of S1P<sub>1</sub>-eGFP as infected mice, demonstrating that S1P<sub>1</sub> receptor expression is not altered following influenza virus infection (Figure 4D). To confirm the S1P<sub>1</sub>-eGFP expression pattern, a western blot for S1P<sub>1</sub>-eGFP was performed on cells FACS sorted from the lungs of infected

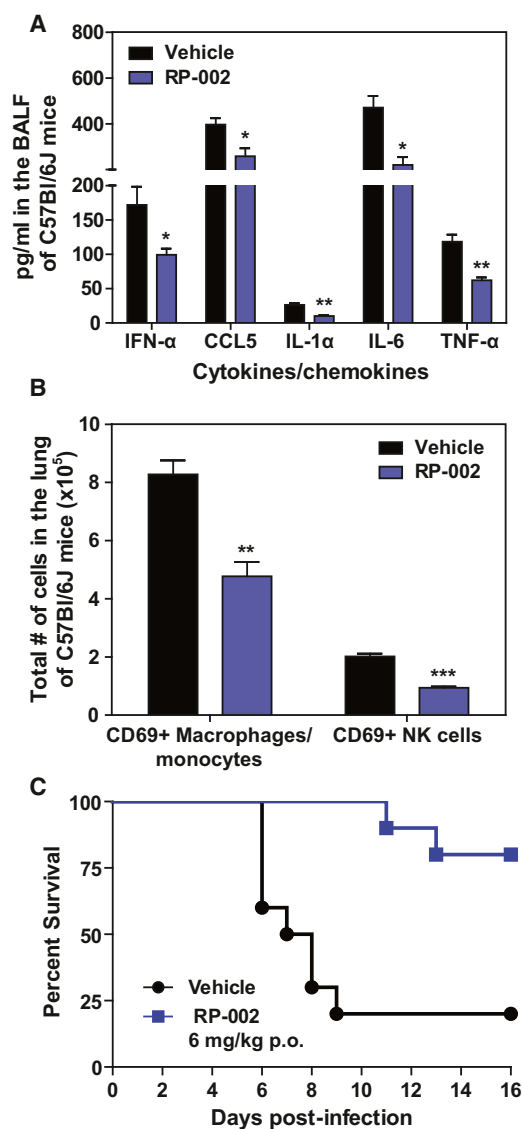

**Figure 3. Oral Administration of an S1P<sub>1</sub> Agonist Suppresses Early Innate Cytokine and Chemokine Production and Significantly Improves Survival to Lethal Infection with H1N1 2009 Swine Influenza Virus**

Mice were infected with  $2 \times 10^5$  PFU A/Wisconsin/WSLH34939/09 and treated by gavage with either vehicle (water) or RP-002 (6 mg/kg on 1 and 25 hr postinfection for cytokine and cell recruitment assays at 48 hr, with a third dose administered at 49 hr for the 16 day survival experiment).

(A) Levels of proinflammatory cytokines and chemokines were analyzed in the BALF 48 hr postinfection by ELISA.

(B) Total numbers of activated (CD69<sup>+</sup>) macrophages/monocytes and NK cells were detected in collagenase-digested lungs 48 hr postinfection by flow cytometry.

(C) Mice were monitored daily for survival for 16 days postinfection.

For (A) and (B), data represent the average  $\pm$  SEM of four to five mice per group, whereas (C) had ten mice per group. \* $p < 0.05$ ; \*\* $p < 0.005$ ; \*\*\* $p < 0.0005$ . Data are representative of three independent experiments. See also Figure S3.

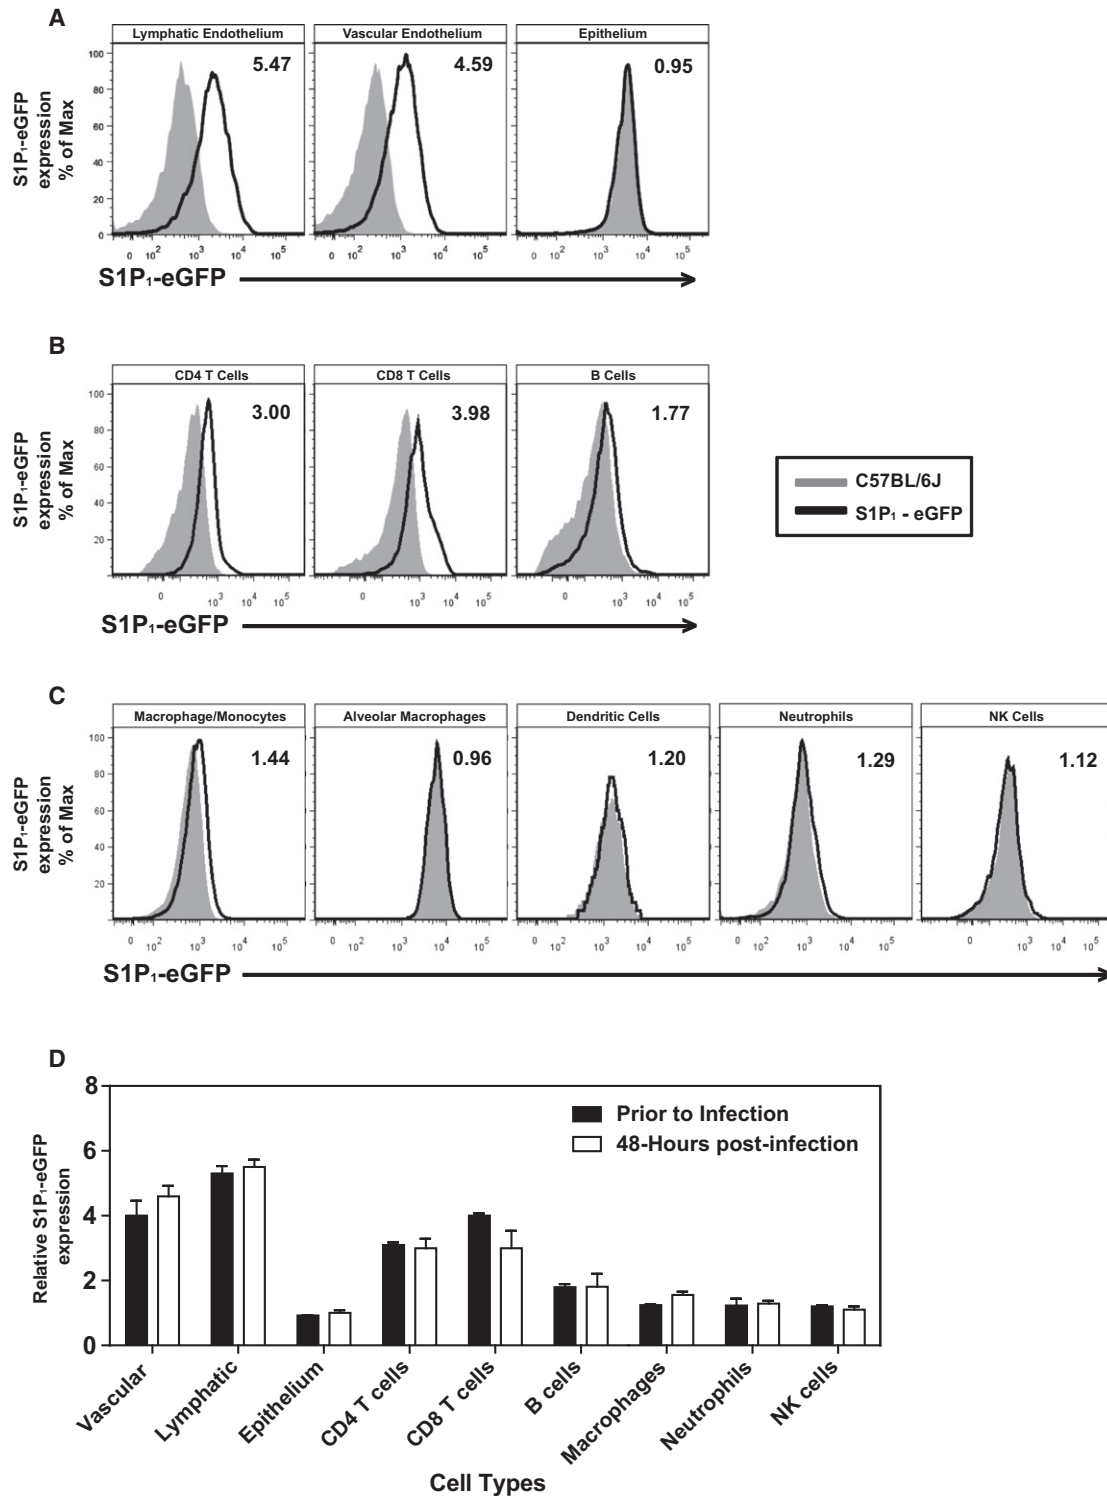

**Figure 4. S1P<sub>1</sub> Receptor Is Expressed on Pulmonary Endothelium and Lymphocytes, but Not on Pulmonary Epithelial Cells**

(A–C) Flow cytometry histograms showing eGFP fluorescence from heterozygous S1P<sub>1</sub>-eGFP on lung endothelial and epithelial cells. (A) CD4 and CD8 T cells and B cells. (B) Macrophages, neutrophils, dendritic cells, and NK cells (C) prior to influenza virus infection.

(D) Relative expression of S1P<sub>1</sub>-eGFP on lung cell populations before or 48 hr after influenza virus infection. The numbers in the upper-right corner of each plot represent the relative eGFP expression as calculated by dividing the MFI of eGFP on S1P<sub>1</sub>-eGFP transgenic mice over eGFP MFI of C57BL/6J littermate controls. Data represent average ± SD from two to five mice per group. Results are representative of three independent experiments. See also Figure S4.



and uninfected mice. Endothelial cells, T cells, and B cells were positive for S1P<sub>1</sub>-eGFP in uninfected mice, confirming our flow cytometry results (Figure S4A). However, though S1P<sub>1</sub>-eGFP was detected by western blot in B cells from uninfected mice, we did not detect S1P<sub>1</sub>-eGFP expression by western blot in influenza virus-infected lung-resident B cells (Figure S4A). We did not detect S1P<sub>1</sub>-eGFP expression by western blot in epithelial cells, macrophages/monocytes, and alveolar macrophages either before or after influenza virus infection (Figure S4A). Moreover, CYM-5442 treatment of infected S1P<sub>1</sub>-eGFP knockin mice did not diminish expression of S1P<sub>1</sub>-eGFP on endothelial cells, T cells, or B cells, demonstrating that administration of this S1P<sub>1</sub>-specific agonist does not induce degradation of the S1P<sub>1</sub> receptor (Figure S4B). Therefore, CYM-5442 does not exert an antagonistic effect due to receptor degradation, demonstrating functional agonism of S1P<sub>1</sub> as the mechanism by which CYM-5442 suppresses cytokine storm.

### Inhibition of Cytokine Storm Is Not Due to Lymphocyte S1P<sub>1</sub> Receptor Activation

Lymphocytes and pulmonary endothelium are the only cells within the lung that express measurable amounts of S1P<sub>1</sub>-eGFP as detected by flow cytometry and western blot. It is plausible that lymphocytes within the lung provide a bystander effect during the innate immune response to influenza virus infection. To rule out a role for lymphocytes during S1P<sub>1</sub> receptor-mediated inhibition of inflammation following influenza virus infection, lymphocyte-deficient *Rag2*<sup>-/-</sup> mice were infected and treated with vehicle or CYM-5442. Administration of CYM-5442 to influenza virus-infected *Rag2*<sup>-/-</sup> mice resulted in significant inhibition of expression of IFN- $\alpha$ , CCL2, IL-6, TNF- $\alpha$ , and IFN- $\gamma$  (Figure 5A), in addition to CCL5, CXCL2, and CXCL10 (Figure S1B). Atypical lymphocyte populations that could, in principal, contribute to suppression of cytokine production did not express S1P<sub>1</sub>-eGFP and thus also do not contribute to this mechanism. Inflammatory cell infiltrates, including macrophages/monocytes and NK cells, were significantly reduced in CYM-5442-treated *Rag2*<sup>-/-</sup> mice (Figure 5B). Reduced numbers of neutrophils were also observed within the infected lung, but the difference was not statistically significant (Figure 5B). Moreover, lung-infiltrating macrophages and NK cells in *Rag2*<sup>-/-</sup> mice were less activated, as measured by CD69 surface expression (Figure S5). CYM-5442 treatment of influenza virus-infected lymphocyte-deficient mice inhibits the innate inflammatory response, excluding a role for lymphocytes as key regulators of influenza virus-induced cytokine storm.

### S1P<sub>1</sub> Receptor Agonism Suppresses Immune Cell Recruitment through Downregulation of Chemokine Production by Lung Endothelial Cells

The strong expression of S1P<sub>1</sub>-eGFP receptor on pulmonary endothelium, coupled with the inhibition of cytokine storm in *RAG2*<sup>-/-</sup> mice, suggests that S1P<sub>1</sub> receptor signaling in lung endothelial cells suppresses cytokine storm. Endothelial cells have been shown to produce various cytokines and chemokines during inflammatory processes and may be a source of cytokines and chemokines in the lung during influenza virus infection. To evaluate the effects of CYM-5442 treatment on pulmonary

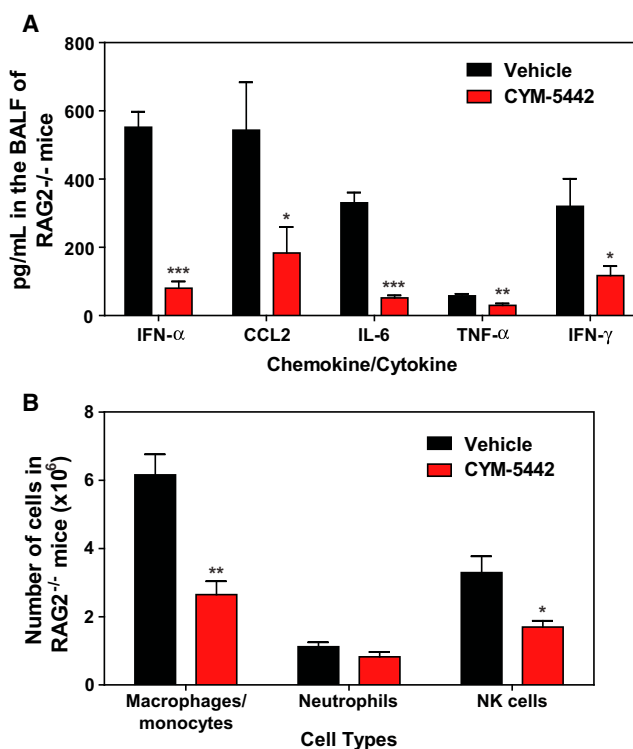

**Figure 5. S1P<sub>1</sub> Receptor Agonism Suppresses Early Proinflammatory Immune Responses Independently of Lymphocytes**  
*Rag2*<sup>-/-</sup> mice were infected and treated with either vehicle or CYM-5442, as in Figure 1.

(A) Proinflammatory cytokines and chemokines were measured in BALF by ELISA 48 hr postinfluenza infection.

(B) Total numbers of innate immune cell recruitment were quantified from collagenase-digested lungs by flow cytometry at 48 hr postinfluenza virus infection.

Data represent average  $\pm$  SEM from five mice per group. \* $p$  < 0.05; \*\* $p$  < 0.005; \*\*\* $p$  < 0.0005. Results are representative of two independent experiments. See also Figure S1 and Figure S5.

endothelial cell cytokine and chemokine production, we purified lung endothelial cell populations and performed mRNA and protein analyses. Endothelial cells expressed elevated levels of the chemokines CCL2, CCL5, and CXCL10 at the mRNA level (Figure 6A). Importantly, treatment with CYM-5442 significantly reduced mRNA expression of chemokines in lung endothelial cells compared to vehicle-treated mice early after influenza virus infection (Figure 6A). Examination of chemokine production in purified lung vascular and lymphatic endothelial cells revealed a significant reduction in chemokine production at the protein level after CYM-5442 treatment (Figure 6B). Analysis of pulmonary endothelial cell integrin expression did not show appreciable differences in mice infected with influenza virus treated with vehicle compared to CYM-5442 (Figure S6).

Because chemokine presentation on endothelial cells is crucial for leukocyte activation and extravasation into infected tissue, we asked whether reduction of chemokine expression following CYM-5442 treatment resulted in reduced entry of inflammatory cells into the infected lung. For these experiments,

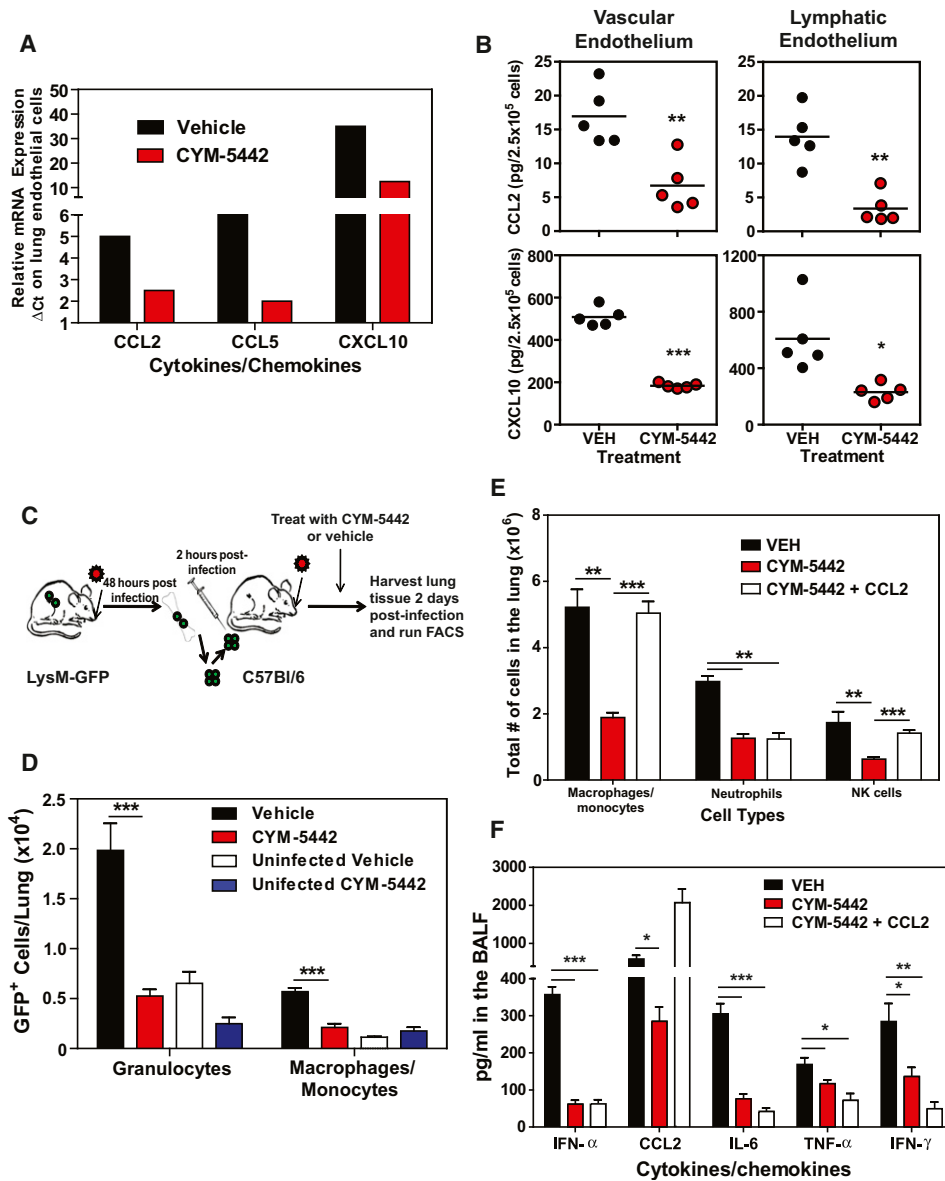

**Figure 6. S1P<sub>1</sub> Receptor Agonism Actively Suppresses Recruitment of Innate Immune Cells through Downregulation of Chemokine Expression on Lung Endothelial Cells**

(A) Relative mRNA expression of chemokines from purified lung endothelial cell populations at 36 hr postinfluenza virus infection.

(B) Protein expression of CCL2 and CXCL10 measured by ELISA on FACS-purified vascular and lymphatic lung endothelial cells 48 hr postinfluenza virus infection.

(C) LysM-GFP mice were infected with  $1 \times 10^4$  PFU of influenza virus. At 2 days later, bone marrow cells were harvested from infected LysM-GFP mice and transferred into C57BL/6J mice that were either left uninfected or infected with  $1 \times 10^4$  PFU of influenza virus 2 hr prior. Mice receiving bone marrow cells from LysM-GFP-positive mice were treated with either vehicle or CYM-5442 (2 mg/kg 1, 13, 25, and 37 hr postinfection), and at 48 hr postinfection, total lung cells were harvested from lung homogenates and the total numbers of GFP-expressing granulocytes (CD11b<sup>+</sup>, Ly6G<sup>+</sup>) and macrophages/monocytes (CD11b<sup>+</sup>F480<sup>+</sup>) were quantified.

(D) Total number of LysM-GFP-positive granulocytes and macrophages/monocytes per lung of uninfected or infected mice treated with either vehicle or CYM-5442.

(E) Exogenous intratracheal administration of chemokine restores recruitment of innate immune cells. However, it does not resurrect cytokine/chemokine production after CYM-5442 treatment. Mice were infected with  $1 \times 10^4$  PFU WSN influenza virus, and either vehicle (water) or CYM-5442 (2 mg/kg 1, 13, 25, and 37 hr postinfection) were administered to mice i.t. Following administration of CYM-5442, recombinant mouse CCL2 was administered (50  $\mu$ g) i.t. directly into the lungs. The bar graph shows the total numbers of macrophages/monocytes, neutrophils, and NK cells in the lung 48 hr postinfluenza virus infection.

(F) Proinflammatory cytokines and chemokines were measured in BALF 48 hr postinfection by ELISA in mice treated with vehicle, CYM-5442, or CYM-5442 + mCCL2, as in (E).

Data represent average  $\pm$  SEM from five mice/group. \* $p < 0.05$ ; \*\* $p < 0.005$ ; \*\*\* $p < 0.0005$ . Results are representative of two independent experiments. See also Figure S1 and Figure S6.

we used LysM-GFP mice in which macrophages, monocytes, and neutrophils express green fluorescent protein, allowing us to track these cell populations after adoptive transfer into congenic C57BL/6J mice. We infected LysM-GFP mice with influenza virus and 48 hr later purified bone marrow cells for adoptive transfer.  $5 \times 10^6$  LysM-GFP bone marrow cells were transferred into influenza virus-infected C57BL/6J mice treated with either vehicle or CYM-5442 (Figure 6C). The lungs of infected or uninfected C57BL/6J mice receiving LysM-GFP cells were then harvested 48 hr postinfection, and the numbers of GFP-positive cells in the lung were quantified. Treatment with CYM-5442 resulted in significantly reduced recruitment of both GFP-positive neutrophils (CD11b<sup>+</sup> F480<sup>-</sup> Ly6G<sup>+</sup>) and macrophages/monocytes (CD11b<sup>+</sup> Ly6G<sup>-</sup> F480<sup>+</sup>) into the lung (Figure 6D). Therefore, CYM-5442 treatment inhibits the infiltration of circulating inflammatory cells into the lung.

S1P<sub>1</sub> receptor signaling is associated with enhanced capillary integrity (Rosen et al., 2007), whereby S1P<sub>1</sub> receptor antagonists induce vascular leakage (Rosen et al., 2008; Sanna et al., 2006), and S1PR-selective agonists protect from vascular leakage induced by exogenous administration of VEGF (Sanchez et al., 2003). Though myelomonocytic recruitment is not modulated by endothelial permeability changes, we formally assessed whether suppression of inflammatory cell recruitment to the lung reflected a passive inhibition of leukocyte recruitment or whether suppression of chemokines on lung endothelial cells limits innate immune cell recruitment. Rescue experiments were performed in which mice were infected with influenza in the presence or absence of intratracheal administration of recombinant murine CCL2 (rmCCL2), with or without CYM-5442 treatment. Administration of rmCCL2 to infected mice treated with CYM-5442 restored macrophage/monocyte and NK cell numbers in the lung to levels equivalent to infected mice treated with vehicle (Figure 6E) 48 hr postinfection. These data demonstrate that CYM-5442 inhibition of cellular infiltration into the lung is not due to the enhancement of endothelial cell barrier function but due to suppression of chemokine production. Therefore, S1P<sub>1</sub> receptor agonism suppresses endothelial cell chemokine expression, resulting in diminished cell infiltration. Despite the rescue of CCL2 levels in the BALF and the restoration of macrophage/monocyte recruitment into the lung of CYM-5442-treated mice, global cytokine and chemokine production was not restored (Figure 6F and Figure S1C). Influenza virus infection of CCR2-deficient mice results in substantial reductions of infiltrating macrophages/monocytes (Dawson et al., 2000). To rule out infiltrating macrophages, we infected CCR2-deficient mice with WSN influenza virus as done above and treated with either vehicle or CYM-5442. Infection of CCR2-deficient mice resulted in significantly reduced numbers of macrophages/monocytes without altering neutrophil or NK cell numbers in the lung 48 hr postinfection (Figure S7A). Despite reduced levels of macrophages/monocytes in the lung, we still detected significant levels of IFN- $\alpha$ , CCL2, CCL3, CCL5, CXCL2, CXCL10, IL-1 $\alpha$ , IL-6, and IFN- $\gamma$  (Figure S7B). More importantly, treatment of CCR2-deficient mice with CYM-5442 still significantly reduced all cytokines and chemokines tested at 48 hr postinfection except for CCL5 (Figure S7B). Failure to inhibit cytokine and chemokine production in CCR2-deficient

mice or to re-establish cytokine and chemokine production by the induction of macrophage/monocyte cell infiltration through rmCCL2 administration following CYM-5442 treatment suggests that monocytes and macrophages are not major sources of early cytokine and chemokine production. Furthermore, these data indicate that cell recruitment and cytokine responses may be uncoupled events.

### Proinflammatory Cytokine Responses Are Independent of Innate Immune Cell Recruitment and Dependent on Type I Interferon Signaling

Infiltration of macrophages and NK cells alone does not appear to be associated with cytokine storm. Therefore, we evaluated the contribution of total inflammatory cell infiltration to cytokine production during influenza virus infection. Mice were treated with an anti-CD11b antibody (M7/80) that has been shown to inhibit the recruitment of CD11b-expressing cells into inflamed tissues (Rosen and Gordon, 1987). Though treatment with anti-CD11b significantly inhibited the recruitment of macrophages/monocytes, neutrophils, and NK cells into the lung (Figure 7A), we observed no reduction in levels of proinflammatory cytokines/chemokines, other than IFN- $\gamma$  (Figure 7B), which is probably a direct result of diminished infiltration of NK cells, the primary source of IFN- $\gamma$  at this time point. Moreover, treatment with CYM-5442 significantly inhibited the production of IFN- $\alpha$ , CCL2, IL-6, TNF- $\alpha$ , and IFN- $\gamma$  (Figure 7B), in addition to CCL3, CCL5, CXCL2, CXCL10, and IL-1 $\alpha$  (Figure S1D) in anti-CD11b-treated mice. These results further demonstrate that innate cell recruitment and cytokine production are independent events early after influenza virus infection, both which are inhibited by S1P<sub>1</sub> receptor agonism of pulmonary endothelial cells. Importantly, our data demonstrate that inflammatory cell infiltration into the lung is not required for cytokine and chemokine production. An additional line of evidence excluding hematopoietic cells from S1P<sub>1</sub> agonist-mediated reduction of early innate cytokine and chemokine responses following influenza virus infection was provided by irradiation resistance of S1P<sub>1</sub> agonist suppression. C57BL/6J mice were irradiated with 500 rads and 24 hr later infected with WSN influenza virus and treated with either vehicle or CYM-5442. Irradiation reduced CD45<sup>+</sup> hematopoietic cells in lung by 90% (vehicle:  $2 \times 10^7$  cell/lung versus 500 rads:  $2 \times 10^6$  cells/lung), and importantly, treatment of irradiated mice with CYM-5442 significantly reduced the levels of IFN- $\alpha$  (irradiated vehicle: 86 pg/ml versus irradiated CYM-5442: 17.9 pg/ml,  $p = 0.0006$ ), CCL2 (irradiated vehicle: 944 pg/ml versus irradiated CYM-5442: 452 pg/ml,  $p = 0.00002$ ), CXCL10 (irradiated vehicle: 204 pg/ml versus irradiated CYM-5442: 83 pg/ml,  $p = 0.00003$ ), and IL-6 (irradiated vehicle: 170 pg/ml versus irradiated CYM-5442: 70 pg/ml,  $p = 0.0001$ ), demonstrating that a radiation-resistant cell population mediated S1P<sub>1</sub> receptor-mediated suppression of the inflammatory response. These results, coupled with the restricted S1P<sub>1</sub> receptor expression pattern, support an important role for endothelial cells in regulating pulmonary innate immune responses to influenza virus.

Type I interferons, predominantly IFN- $\alpha$  species, are elevated early after respiratory virus infection and are thought to be crucial for the production of proinflammatory cytokines and chemokines. Our results thus far have demonstrated that CYM-5442



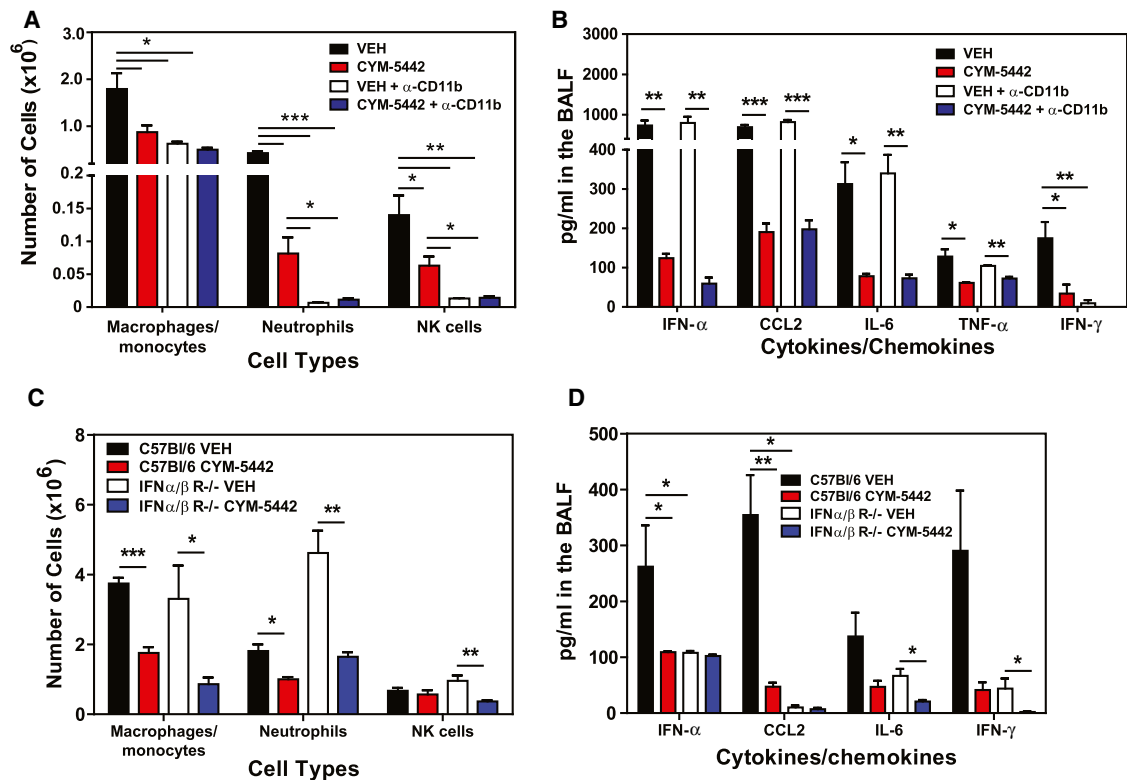

**Figure 7. Proinflammatory Cytokine Responses Are Independent of Innate Immune Cell Recruitment and Dependent on Type I Interferon Signaling**

(A) Total numbers of innate immune cells were quantified from lung digests by flow cytometry at 48 hr postinfluenza virus infection in mice treated 1 hr postinfection with vehicle or CYM-5442 in the presence of either anti-CD11b or isotype control antibody (M7/80) (0.5 mg/mouse) 0 and 24 hr postinfection.

(B) Proinflammatory cytokines and chemokines were measured 48 hr postinfection by ELISA in BALF in mice treated as in (A).

(C) C57BL/6J or IFN $\alpha/\beta$  receptor-deficient mice were infected with  $1 \times 10^4$  PFU of influenza virus and treated with either vehicle or CYM-5442 (2 mg/kg 1, 13, 25, and 36 hr postinfection). Total numbers of innate immune cells were quantified from lung digests by flow cytometry at 48 hr postinfluenza virus infection, and (D) proinflammatory cytokines and chemokines were measured 48 hr postinfection by ELISA in BALF fluid.

Data represent average  $\pm$  SEM from five mice per group. \* $p < 0.05$ ; \*\* $p < 0.005$ ; \*\*\* $p < 0.0005$ . Results are representative of two independent experiments. See also Figure S1 and Figure S7.

treatment consistently inhibits the production of IFN- $\alpha$  in the lung early after influenza virus infection (Figure 1, Figure 2, Figure 5, and Figure 6). Therefore, we postulated that blunting IFN- $\alpha$  production may be a mechanism by which CYM-5442 inhibits cytokine storm early after influenza virus infection. To address this, we infected IFN $\alpha/\beta$  receptor knockout mice with influenza virus, treated these mice with either vehicle or CYM-5442, and measured innate cell recruitment and cytokine/chemokine production 48 hr postinfection. Significant differences were not observed in inflammatory cell recruitment of macrophages/monocytes, neutrophils, and NK cells into the lung of IFN $\alpha/\beta$  receptor-deficient mice when compared to C57Bl/6J mice (Figure 7C). As seen with infected C57Bl/6J mice, CYM-5442 treatment inhibited innate immune cell recruitment in IFN $\alpha/\beta$  receptor-deficient mice 48 hr postinfection (Figure 7C). Despite recruitment of innate immune cells into the lung of IFN $\alpha/\beta$  receptor-deficient mice 48 hr postinfection, these mice exhibited significantly reduced levels of IFN- $\alpha$ , CCL2, IL-6, and IFN- $\gamma$  (Figure 7D) in addition to CCL5 and CXCL10 in the BALF fluid (Figure S1E). Taken together, our data demonstrate that regulation

of cellular recruitment into the pulmonary tissue is mediated by endothelial cells and is independent of type I interferon signaling. Moreover, S1P $_1$  receptor agonism of endothelial cells inhibits IFN- $\alpha$  production and results in the dampening of global proinflammatory cytokine responses.

## DISCUSSION

The recruitment of innate immune cells into the lungs combined with excessive proinflammatory cytokine and chemokine production are hallmarks of influenza virus infection (La Gruta et al., 2007). Contrary to current dogma, which places lung epithelium and inflammatory infiltrate at the center of influenza virus-induced cytokine storm (La Gruta et al., 2007), we demonstrate here a central role for pulmonary endothelium in regulating this process. Furthermore, we determined that both innate immune cell recruitment and early innate cytokine and chemokine production are uncoupled events, with endothelial cells at the center of both processes. The chemical and genetic approaches shown here have a potentially broad impact on

understanding disease pathogenesis. Early dysregulation of innate cellular and cytokine responses predict disease severity and death during highly pathogenic influenza virus infection (Bermejo-Martin et al., 2009; Cillóniz et al., 2009; de Jong et al., 2006; Kobasa et al., 2004, 2007). The early induction of the cytokines IFN- $\alpha$ , TNF- $\alpha$ , IL-1 $\alpha$ , and IL-6 and the chemokines CCL2, CCL3, CXCL2 (IL-8), and CXCL10 are associated with symptom formation in humans (Hayden et al., 1998; Kaiser et al., 2001). TNF- $\alpha$ , IL-1, and IL-6 possess multifunctional activities and are associated with morbidity during influenza virus infection. Chemokines such as CCL2, CCL3, CXCL2, and CXCL10 induce the recruitment of innate immune cells into the lung, which can release more cytokines exacerbating cytokine storm and further damage the lung. We demonstrate that suppression of early innate immune responses through S1P<sub>1</sub> signaling on endothelial cells results in significantly reduced mortality during infection of mice with a human pathogenic strain of influenza virus (Figure 3). Importantly, our results identify a pulmonary cell type, endothelial cells, as potential targets for suppressing excessive innate inflammatory responses.

The ability of CYM-5442 to diminish the production of IFN- $\alpha$  early following influenza virus infection is broadly relevant. The requirement of type I interferon signaling for the early production of multiple cytokines and chemokines after influenza virus infection is striking. Moreover, production of proinflammatory cytokines requires type I interferon signaling, but the type I interferon pathway is dispensable for cell recruitment. Though type I interferon signaling is well known to inhibit viral replication (Garcia-Sastre and Biron, 2006), evidence also points to pathogenic roles for IFN- $\alpha$  during viral infection. Several proinflammatory cytokines and chemokines are downstream of type I interferon receptor signaling. Moreover, disease onset correlates directly with local respiratory production of IFN- $\alpha$  in humans (Hayden et al., 1998). Thus, type I interferon signaling may play dual roles in viral pathogenesis and viral clearance. S1P<sub>1</sub> receptor signaling on pulmonary endothelial cells *in vivo* blunts but does not abolish IFN- $\alpha$  production and may explain why pathology is lessened without compromising the host's ability to clear the virus.

The ability of S1P<sub>1</sub> receptor activation to suppress cytokine and chemokine production in the lung in irradiated mice, coupled to the pattern of S1P<sub>1</sub> receptor expression in the lung, strongly indicates a central endothelial component to early innate immune responses. An interesting question is whether lung lymphatic, vascular, or both endothelial cell populations are directly responsible for the observed immune modulation. Moreover, of the large receptor reserve in blood, endothelium ensures that S1P<sub>1</sub> receptor expression is maintained on both basolateral and luminal surfaces of the targeted endothelial cell populations (Cahalan et al., 2011) and retains a responsiveness to agonist. Additional approaches to separate blood and lymphatic contributions are still needed. Though we know that endothelial cells produce chemokines, endothelial-mediated regulation of cytokine production in the lung still needs to be determined. It is possible that endothelial cells may regulate cytokine production in the lung through a complex crosstalk mechanism with lung epithelium or resident hematopoietic cells. Nevertheless, the identification of endothelial cells as central orchestrators of early innate immune-mediated inflammation is of fundamental interest

and has broad implications for treating multiple diseases. The contribution of aberrant proinflammatory cytokine and chemokine production to pathogenesis has been reported for viral and bacterial diseases, including HIV (Stacey et al., 2009), Hantavirus (Borges et al., 2006), severe acute respiratory syndrome (SARS) (Thiel and Weber, 2008), and pneumococcal bacterial pneumonia (Bergeron et al., 1998). Further, the etiology of several autoimmune conditions has been directly associated with excessive innate immune responses (Kawane et al., 2010; Link, 1998). Thus, understanding the cellular pathways that regulate cytokine storm and developing appropriate chemical signaling tools to identify pathophysiological points of control not only provide insight into microbial-host interactions, but also may ultimately reveal additional approaches to achieve effective immunotherapy in multiple diseases. In addition, our results present a nonlymphopenic mechanism by which sphingosine analog treatment suppresses pathogenic immune responses. Lastly, these data suggest that endogenous S1P acting on endothelial S1P<sub>1</sub> receptor could be a negative regulator of cytokine amplification and raise the possibility that heterogeneities in S1P metabolism between individuals could contribute to the advantages or disadvantages conferred by genetic individuality to host survival in a number of diseases.

## EXPERIMENTAL PROCEDURES

### Mice, Virus, Compounds, and Reagents

Six- to eight-week-old C57Bl/6 male mice and S1P<sub>1</sub>-eGFP mice described elsewhere (Cahalan et al., 2011) were bred and maintained in a closed breeding facility at The Scripps Research Institute. Influenza A/WSN/33 (WSN; H1N1) and the human H1N1 2009 isolate A/Wisconsin/WSLH34939/09 (a kind gift from Yoshihiro Kawaoka, University of Madison, WI) were amplified and plaqued on Madin-Darby Canine Kidney (MDCK) cells. Mice were infected intratracheally (i.t.) with  $1 \times 10^4$  PFU of influenza A/WSN/33 virus or intranasally with  $1 \times 10^5$  PFU of A/Wisconsin/WSLH34939/09 under isoflurane anesthesia. At 1 hr postinfection, mice were anesthetized by isoflurane inhalation for i.t. delivery of vehicle (100  $\mu$ l of water), AAL-R (0.2 mg/kg dissolved in water), CYM-5442 (2 mg/kg dissolved in water), or RP-002 (3 mg/kg i.t. or 6 mg/kg orally dissolved in water). Multiple doses of compound were administered at the specific times listed in the figure legends. (AAL-R and CYM-5442 were synthesized according to published methods (Jo et al., 2005). RP-002, (R)-2-(4-(5-(3-cyano-4-isopropoxyphenyl)-1,2,4-oxadiazol-3-yl)-2,3-dihydro-1H-inden-1-ylamino)-N,N-dimethylacetamide hydrochloride, was synthesized according to the published method (Martinborough et al., 2011). The compound had an EC<sub>50</sub> for S1P<sub>1</sub> of 0.13 nM, was > 100-fold selective versus S1P<sub>5</sub>, and was 10,000-fold selective versus S1P<sub>2</sub>, 3, and 4 respectively, when assayed as described (Cahalan et al., 2011). Recombinant murine CCL2 (mCCL2) was purchased from Shenandoah Biotechnology Inc. (Warwick, PA).

### Cytokine and Chemokine Analysis

The trachea of euthanized mice was exposed, transected, and incubated with a blunt 18 gauge needle. One milliliter of phosphate-buffered saline supplemented with Complete Mini, EDTA-free Protease Inhibitor Cocktail (Roche) was infused and recovered four times. The recovered bronchoalveolar lavage fluid was spun at 3000  $\times$  g for 3 min at 4°C and stored at -80°C until use. Multiplex ELISA was performed on supernatant by Quansys Biosciences (Logan, UT) to detect IL-1 $\alpha$ , IL-1 $\beta$ , IL-2, IL-3, IL-4, IL-5, IL-6, IL-9, IL-10, IL-12p70, TNF- $\alpha$ , MIP-1 $\alpha$ , MCP-1, GM-CSF, IFN- $\gamma$ , and RANTES. ELISAs were also performed using CCL2 (MCP-1), CCL5 (RANTES), CXCL10 (IP-10), IL-1 $\alpha$ , IL-6, TNF- $\alpha$ , and IFN- $\gamma$  Duoset kits (R&D systems) as well as the *VeriKine* Mouse Interferon-Alpha and Interferon-Beta ELISA Kits (Pestka Biomedical Laboratories, Inc). For the quantification of mRNA chemokine expression, lung

endothelial cells were FACS purified to > 90%–95% purity, and mRNA was purified using the RNeasy mini kit from QIAGEN. Prior to real-time PCR, genomic DNA was digested and cDNA was made using the RT<sup>2</sup> First Strand Kit (C-03) according to manufacturer's instructions (SA Biosciences, Frederick, MD). cDNA (200 ng) was added to individual wells and quantified using the RT<sup>2</sup> profiler PCR Array according to the manufacturer's instructions (SA Biosciences, Frederick, MD).

### Cellular Analysis by Flow Cytometry

Lungs were harvested from PBS-perfused mice and mechanically diced into small tissue pieces using surgical scissors. Diced lungs were suspended in 4 ml of CDT1 buffer (0.5 mg/ml collagenase from Clostridium histolyticum type IV [Sigma], 0.1 mg/ml Dnase I from bovine pancreas grade II [Roche], 1 mg/ml trypsin inhibitor type I-s [Sigma] in DMEM) for 1 hr at 37°C. Lung was then disrupted mechanically through a 100 µm filter, and red blood cells were lysed using red blood cell lysis buffer (0.02 Tris-HCL and 0.14 NH<sub>4</sub>Cl). Inflammatory cells were purified by centrifugation in 35% PBS-buffered Percoll (GE Healthcare Life Sciences) at 1,500 rpm for 15 min. Cell pellets were resuspended in staining buffer, and Fc receptors were blocked using 25 µg/ml anti-mouse CD16/32 (BD Biosciences). Cells were stained with the following anti-mouse antibodies: AlexaFluor 488-conjugated gp38 (eBioscience; clone eBio8.1.1), PE-conjugated (BioLegend, Inc.; clone ME13.3) and APC-conjugated (eBioscience; clone 390) CD31, PE-Cy7-conjugated EpCAM (BioLegend, Inc.; clone 68.8), Pacific blue-conjugated CD45.2 (BioLegend, Inc.; clone 104), PerCP-Cy5.5-conjugated NK1.1 (BD Biosciences; clone PK136), PE-Cy7-conjugated CD3e (eBioscience; clone 145-2C11), e450-conjugated CD4 (eBioscience; clone L3T4), PE-conjugated CD8α (BD Biosciences; clone 53-6.1), Pacific blue-conjugated B220 (BD Biosciences; clone RA3-6B2), PE-conjugated CD19 (BD Biosciences, clone 1D3), PE-Cy7-conjugated CD11b (eBiosciences; clone M1/70), PerCP-Cy5.5-conjugated CD11c (eBiosciences; clone N418), APC-conjugated Gr-1 (BD Biosciences; clone RB6-8C5), Pacific blue and PE-conjugated Ly6G (BD Biosciences; clone IA8), APC-conjugated F480 (eBioscience; clone BM8), PE-conjugated 7/4 (AbD Serotec; clone 7/4), PE-conjugated I/A-I/E (BD Biosciences; clone M5/114.15.2), PE-Cy7 conjugated CD205 (eBiosciences; clone 205yekt), Fitc-conjugated CD69 (BD Biosciences; clone H1.2F3), and APC-conjugated CD25 (eBiosciences; clone PC61.5). Flow cytometry acquisition was performed with BD FACSDiva-driven BD LSR II flow cytometer (Becton, Dickinson and Company). Data were then analyzed with FlowJo software (Treestar Inc.).

### Western Blot

FACS-purified lung cell populations (1 × 10<sup>5</sup> cells) using the antibodies described above were homogenized in RIPA buffer supplemented with protease inhibitors (Pierce). Lysates were centrifuged at 50,000 × g for 30 min, and the protein concentration in the supernatant was determined by BCA assay (Pierce). Equal amounts of protein from cell lysates were loaded in nondenaturing conditions and separated by SDS-PAGE in 4%–12% NuPAGE (Novex) Bis-Tris gels. Gels were transferred to PVDF membranes followed by probing for GFP using an anti-GFP antibody (Abcam) and an anti-rabbit Ig light-chain HRP secondary (ELC Biosciences) using chemiluminescence autoradiography.

### SUPPLEMENTAL INFORMATION

Supplemental Information includes seven figures and can be found with this article online at doi:10.1016/j.cell.2011.08.015.

### ACKNOWLEDGMENTS

This is Publication Number 21112 from the Department of Immunology and Microbial Science and the Department of Chemical Physiology and The Scripps Research Institute Molecular Screening Center, The Scripps Research Institute (TSRI). This work was supported, in part, by USPHS grants AI074564 (M.B.A.O., H.R., K.B.W., and J.R.T.), AI009484 (M.B.A.O.), AI05509 (H.R.), MH084512 (H.R.), and NIH training grants NS041219 (K.B.W.), AI007244 (K.B.W.), and AI007364 (J.R.T.). We thank Marcus Boehm, Li-ming Huang, and Bryan Clemons (Receptos, Inc.) for helping provide RP-002 as a chemical

tool. Hugh Rosen is a founder of Receptos. Edward Roberts is a consultant to Receptos. Fiona Scott, Esther Martinborough, and Robert Peach are employees of Receptos.

Received: February 23, 2011

Revised: March 27, 2011

Accepted: August 13, 2011

Published: September 15, 2011

### REFERENCES

- Bergeron, Y., Ouellet, N., Deslauriers, A.M., Simard, M., Olivier, M., and Bergeron, M.G. (1998). Cytokine kinetics and other host factors in response to pneumococcal pulmonary infection in mice. *Infect. Immun.* 66, 912–922.
- Bermejo-Martin, J.F., Ortiz de Lejarazu, R., Pumarola, T., Rello, J., Almansa, R., Ramirez, P., Martin-Loeches, I., Varillas, D., Gallegos, M.C., Serón, C., et al. (2009). Th1 and Th17 hypercytokinemia as early host response signature in severe pandemic influenza. *Crit. Care* 13, R201.
- Borges, A.A., Campos, G.M., Moreli, M.L., Souza, R.L., Aquino, V.H., Saggiore, F.P., and Figueiredo, L.T. (2006). Hantavirus cardiopulmonary syndrome: immune response and pathogenesis. *Microbes Infect.* 8, 2324–2330.
- Brinkmann, V., Billich, A., Baumruker, T., Heining, P., Schmuuder, R., Francis, G., Aradhye, S., and Burtin, P. (2010). Fingolimod (FTY720): discovery and development of an oral drug to treat multiple sclerosis. *Nat. Rev. Drug Discov.* 9, 883–897.
- Cahalan, S.M., Gonzalez-Cabrera, P.J., Sarkisyan, G., Nguyen, N., Schaeffer, M.T., Huang, L., Yeager, A., Clemons, B., Scott, F., and Rosen, H. (2011). Actions of a picomolar short-acting S1P<sub>1</sub> agonist in S1P<sub>1</sub>-eGFP knock-in mice. *Nat. Chem. Biol.* 7, 254–256.
- Cillóniz, C., Shinya, K., Peng, X., Korth, M.J., Proll, S.C., Aicher, L.D., Carter, V.S., Chang, J.H., Kobasa, D., Feldmann, F., et al. (2009). Lethal influenza virus infection in macaques is associated with early dysregulation of inflammatory related genes. *PLoS Pathog.* 5, e1000604.
- Dawson, T.C., Beck, M.A., Kuziel, W.A., Henderson, F., and Maeda, N. (2000). Contrasting effects of CCR5 and CCR2 deficiency in the pulmonary inflammatory response to influenza A virus. *Am. J. Pathol.* 156, 1951–1959.
- de Jong, M.D., Simmons, C.P., Thanh, T.T., Hien, V.M., Smith, G.J., Chau, T.N., Hoang, D.M., Chau, N.V., Khanh, T.H., Dong, V.C., et al. (2006). Fatal outcome of human influenza A (H5N1) is associated with high viral load and hypercytokinemia. *Nat. Med.* 12, 1203–1207.
- García-Sastre, A. (2010). Influenza virus receptor specificity: disease and transmission. *Am. J. Pathol.* 176, 1584–1585.
- García-Sastre, A., and Biron, C.A. (2006). Type 1 interferons and the virus-host relationship: a lesson in détente. *Science* 312, 879–882.
- Gonzalez-Cabrera, P.J., Jo, E., Sanna, M.G., Brown, S., Leaf, N., Marsolais, D., Schaeffer, M.T., Chapman, J., Cameron, M., Guerrero, M., et al. (2008). Full pharmacological efficacy of a novel S1P<sub>1</sub> agonist that does not require S1P<sub>1</sub>-like headgroup interactions. *Mol. Pharmacol.* 74, 1308–1318.
- Hayden, F.G., Fritz, R., Lobo, M.C., Alvord, W., Strober, W., and Straus, S.E. (1998). Local and systemic cytokine responses during experimental human influenza A virus infection. Relation to symptom formation and host defense. *J. Clin. Invest.* 101, 643–649.
- Itoh, Y., Shinya, K., Kiso, M., Watanabe, T., Sakoda, Y., Hatta, M., Muramoto, Y., Tamura, D., Sakai-Tagawa, Y., Noda, T., et al. (2009). In vitro and in vivo characterization of new swine-origin H1N1 influenza viruses. *Nature* 460, 1021–1025.
- Jo, E., Sanna, M.G., Gonzalez-Cabrera, P.J., Thangada, S., Tigiy, G., Osborne, D.A., Hla, T., Parrill, A.L., and Rosen, H. (2005). S1P<sub>1</sub>-selective in vivo-active agonists from high-throughput screening: off-the-shelf chemical probes of receptor interactions, signaling, and fate. *Chem. Biol.* 12, 703–715.
- Kaiser, L., Fritz, R.S., Straus, S.E., Gubareva, L., and Hayden, F.G. (2001). Symptom pathogenesis during acute influenza: interleukin-6 and other cytokine responses. *J. Med. Virol.* 64, 262–268.

- Kawane, K., Tanaka, H., Kitahara, Y., Shimaoka, S., and Nagata, S. (2010). Cytokine-dependent but acquired immunity-independent arthritis caused by DNA escaped from degradation. *Proc. Natl. Acad. Sci. USA* *107*, 19432–19437.
- Kobasa, D., Jones, S.M., Shinya, K., Kash, J.C., Copps, J., Ebihara, H., Hatta, Y., Kim, J.H., Halfmann, P., Hatta, M., et al. (2007). Aberrant innate immune response in lethal infection of macaques with the 1918 influenza virus. *Nature* *445*, 319–323.
- Kobasa, D., Takada, A., Shinya, K., Hatta, M., Halfmann, P., Theriault, S., Suzuki, H., Nishimura, H., Mitamura, K., Sugaya, N., et al. (2004). Enhanced virulence of influenza A viruses with the haemagglutinin of the 1918 pandemic virus. *Nature* *431*, 703–707.
- La Gruta, N.L., Kedzierska, K., Stambas, J., and Doherty, P.C. (2007). A question of self-preservation: immunopathology in influenza virus infection. *Immunol. Cell Biol.* *85*, 85–92.
- Link, H. (1998). The cytokine storm in multiple sclerosis. *Mult. Scler.* *4*, 12–15.
- Marsolais, D., Hahm, B., Edelmann, K.H., Walsh, K.B., Guerrero, M., Hatta, Y., Kawaoka, Y., Roberts, E., Oldstone, M.B., and Rosen, H. (2008). Local not systemic modulation of dendritic cell S1P receptors in lung blunts virus-specific immune responses to influenza. *Mol. Pharmacol.* *74*, 896–903.
- Marsolais, D., Hahm, B., Walsh, K.B., Edelmann, K.H., McGavern, D., Hatta, Y., Kawaoka, Y., Rosen, H., and Oldstone, M.B. (2009). A critical role for the sphingosine analog AAL-R in dampening the cytokine response during influenza virus infection. *Proc. Natl. Acad. Sci. USA* *106*, 1560–1565.
- Martinborough, E., Boehm, M., Yeager, A., Yamiyo, J., Huang, L., Brahmachary, E., Moorjani, M., Timony, G., Brooks, J., Peach, R., et al. (2011). Selective sphingosine 1-phosphate receptor modulators and methods of chiral synthesis, World International Patent Organization: WO/2011/060392 p. 92.
- Openshaw, P.J., and Dunning, J. (2010). Influenza vaccination: lessons learned from the pandemic (H1N1) 2009 influenza outbreak. *Mucosal Immunol.* *3*, 422–424.
- Rivera, J., Proia, R.L., and Olivera, A. (2008). The alliance of sphingosine-1-phosphate and its receptors in immunity. *Nat. Rev. Immunol.* *8*, 753–763.
- Rosen, H., and Gordon, S. (1987). Monoclonal antibody to the murine type 3 complement receptor inhibits adhesion of myelomonocytic cells in vitro and inflammatory cell recruitment in vivo. *J. Exp. Med.* *166*, 1685–1701.
- Rosen, H., and Liao, J. (2003). Sphingosine 1-phosphate pathway therapeutics: a lipid ligand-receptor paradigm. *Curr. Opin. Chem. Biol.* *7*, 461–468.
- Rosen, H., Sanna, M.G., Cahalan, S.M., and Gonzalez-Cabrera, P.J. (2007). Tipping the gatekeeper: S1P regulation of endothelial barrier function. *Trends Immunol.* *28*, 102–107.
- Rosen, H., Gonzalez-Cabrera, P., Marsolais, D., Cahalan, S., Don, A.S., and Sanna, M.G. (2008). Modulating tone: the overture of S1P receptor immunotherapeutics. *Immunol. Rev.* *223*, 221–235.
- Rosen, H., Gonzalez-Cabrera, P.J., Sanna, M.G., and Brown, S. (2009). Sphingosine 1-phosphate receptor signaling. *Annu. Rev. Biochem.* *78*, 743–768.
- Sanchez, T., Estrada-Hernandez, T., Paik, J.H., Wu, M.T., Venkataraman, K., Brinkmann, V., Claffey, K., and Hla, T. (2003). Phosphorylation and action of the immunomodulator FTY720 inhibits vascular endothelial cell growth factor-induced vascular permeability. *J. Biol. Chem.* *278*, 47281–47290.
- Sanna, M.G., Wang, S.K., Gonzalez-Cabrera, P.J., Don, A., Marsolais, D., Matheu, M.P., Wei, S.H., Parker, I., Jo, E., Cheng, W.C., et al. (2006). Enhancement of capillary leakage and restoration of lymphocyte egress by a chiral S1P1 antagonist in vivo. *Nat. Chem. Biol.* *2*, 434–441.
- Stacey, A.R., Norris, P.J., Qin, L., Haygreen, E.A., Taylor, E., Heitman, J., Lebedeva, M., DeCamp, A., Li, D., Grove, D., et al. (2009). Induction of a striking systemic cytokine cascade prior to peak viremia in acute human immunodeficiency virus type 1 infection, in contrast to more modest and delayed responses in acute hepatitis B and C virus infections. *J. Virol.* *83*, 3719–3733.
- Thiel, V., and Weber, F. (2008). Interferon and cytokine responses to SARS-coronavirus infection. *Cytokine Growth Factor Rev.* *19*, 121–132.
- Tscherne, D.M., and Garcia-Sastre, A. (2011). Virulence determinants of pandemic influenza viruses. *J. Clin. Invest.* *121*, 6–13.

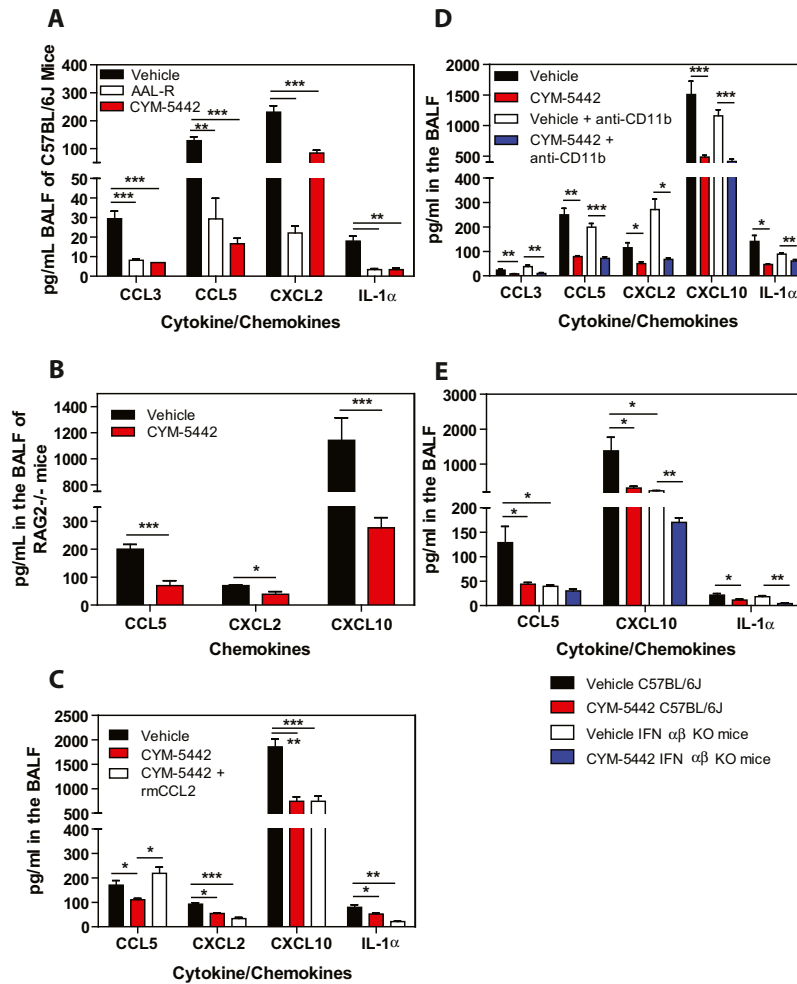

**Figure S1. S1P<sub>1</sub> Agonism Suppressed Multiple Proinflammatory Cytokines/Chemokines following Influenza Virus Infection, Related to Figures 1, Figure 5, Figure 6, and Figure 7**

(A) Pro-inflammatory cytokines and chemokines were measured in C57BL/6J mice 48 hr post-infection in BALF by ELISA.

(B) RAG2<sup>-/-</sup> mice were infected and treated with either vehicle or CYM-5442 as done in Figure 1 and pro-inflammatory cytokines and chemokines were measured in BALF by ELISA 48 hr post-influenza infection.

(C) Pro-inflammatory cytokines and chemokines were measured in BALF 48 hr post-infection by ELISA in mice treated with vehicle, CYM-5442 or CYM-5442 + rmCCL2.

(D) Pro-inflammatory cytokines and chemokines were measured 48 hr post-infection by ELISA in BALF in mice treated with vehicle or CYM-5442 in the presence of either anti-CD11b or isotype control antibody (M7/80) (0.5mg/mouse) 0 and 24 hr post-infection.

(E) C57BL/6J or IFN- $\alpha/\beta$  receptor-deficient mice were infected with  $1 \times 10^4$  PFU of influenza virus and treated with either vehicle or CYM-5442 and pro-inflammatory cytokines and chemokines were measured 48 hr post-infection by ELISA in BALF fluid.

Data represent average  $\pm$  SEM from 5 mice/group. \* $p < 0.05$ ; \*\* $p < 0.005$ ; \*\*\* $p < 0.0005$ . Results are representative of 2 or more independent experiments.



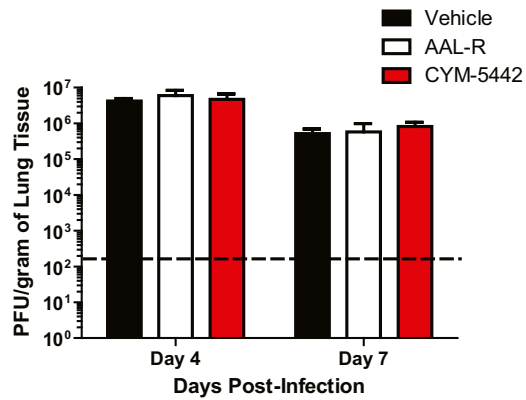

**Figure S2. AAL-R or CYM-5442 Treatment Did Not Alter Viral Titers in the Lung following Influenza Virus Infection, Related to Figure 1**

Mice were infected with  $1 \times 10^4$  PFU WSN influenza virus and either Vehicle (water), AAL-R (0.2mg/kg) (1 hr post-infection) or CYM5442 (2mg/kg) (1,13, 25 and 37 hr-post-infection) were administered i.t. to mice. Viral titers were determined at the indicated times post-infection by plaque assay on MDCK cells. The dotted line indicates the limit of detection of the assay. Data represent average  $\pm$  SEM from 5 mice/group and represent 2 independent experiments.

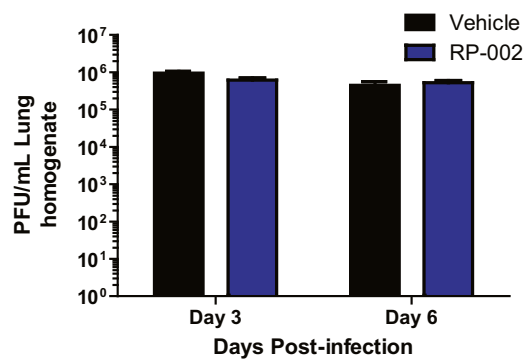

**Figure S3. RP-002 Treatment Does Not Alter Viral Titers in the Lung following Human Pathogenic Influenza Virus Infection, Related to Figure 2 and Figure 3**

Mice were infected with  $1 \times 10^5$  PFU A/Wisconsin/WSLH34939/09 influenza virus and either Vehicle (water) or RP-002 (2mg/kg on 1 and 25 hr post-infection) were administered i.t. to mice. Viral titers were determined at the indicated times post-infection by plaque assay on MDCK cells. Data represent average  $\pm$  SEM from 5 mice/group and represent 2 independent experiments.

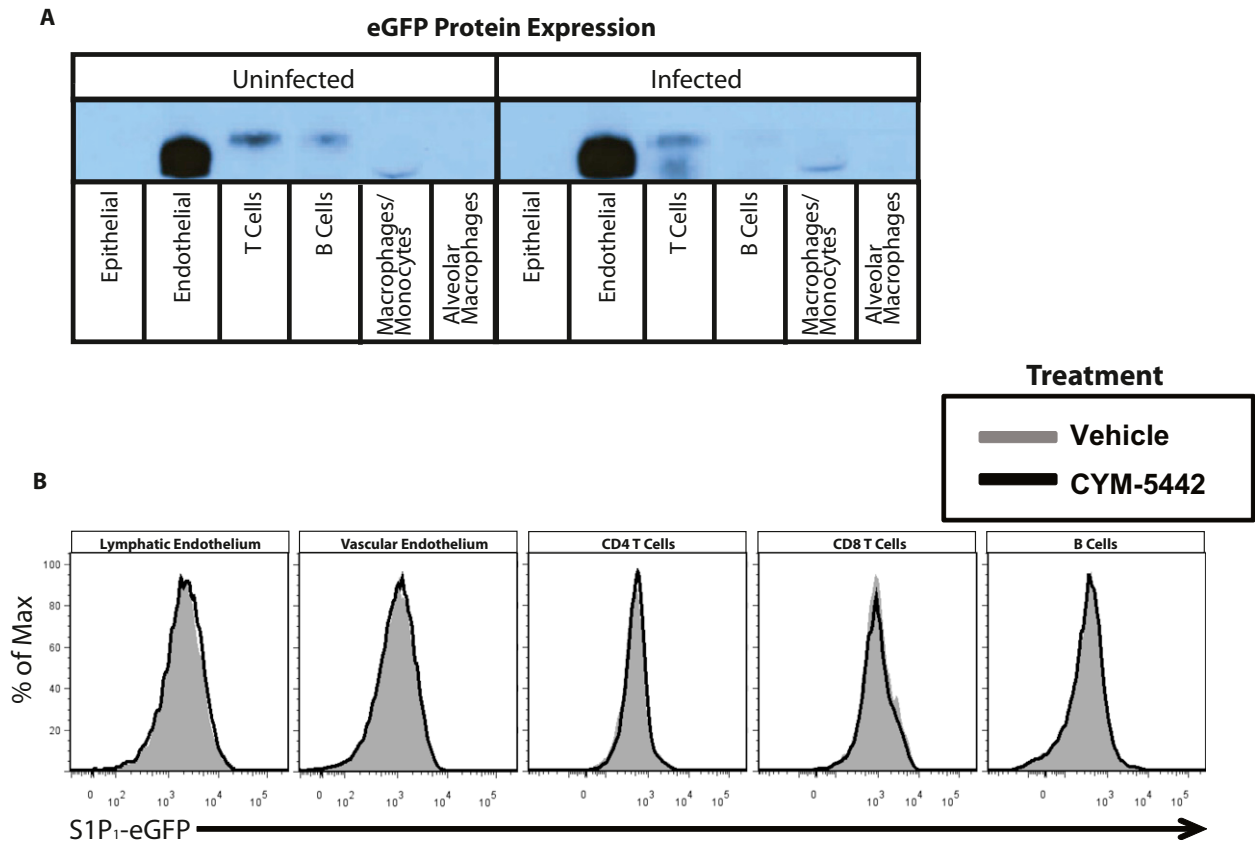

**Figure S4. S1P<sub>1</sub> Receptor Is Expressed on Pulmonary Lymphocytes and Endothelial Cells, Related to Figure 4**

(A) Western blot of FACS purified lung cell populations from uninfected and 48 hr post-influenza virus infected S1P1-eGFP mice.

(B) S1P<sub>1</sub> receptor expression is not altered after CYM-5442 treatment. Flow cytometry histograms showing eGFP fluorescence on lung endothelial, epithelial cells, CD4, CD8 T cells and B cells in S1P1-eGFP mice infected with influenza virus and treated with or without CYM-5442.

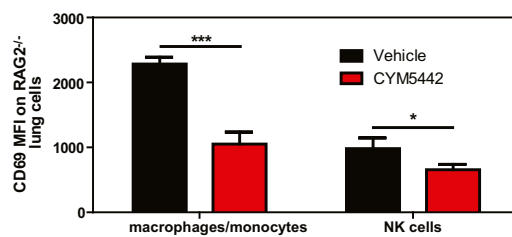

**Figure S5. S1P<sub>1</sub> Agonism Suppresses Innate Immune Cell Activation following Influenza Infection in Lymphocyte-Deficient Mice, Related to Figure 5**

Mean fluorescence intensity of CD69 expression was quantified on vehicle or CYM-5442 treated macrophages/monocytes or NK cells in *Rag2*<sup>-/-</sup> mice 48 hr post-influenza virus infection by flow cytometry staining. Data represent average  $\pm$  SEM representing 5 mice/group. \* $p < 0.05$ ; and \*\*\* $p < 0.0005$ . Results are representative of two independent experiments.

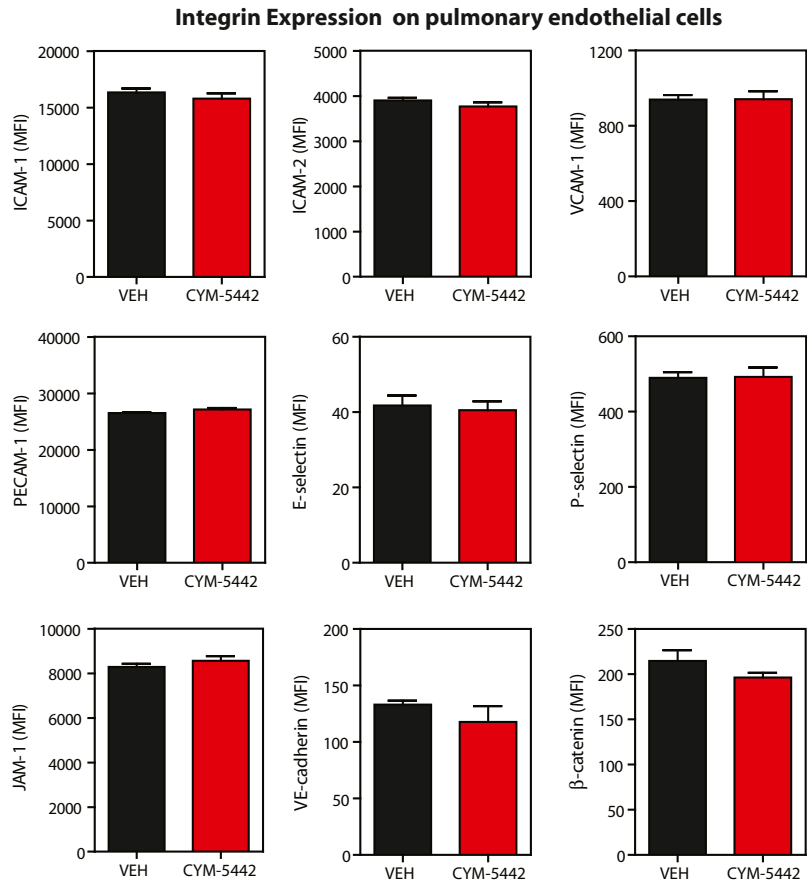

**Figure S6. S1P<sub>1</sub> Agonism Does Not Alter Levels of Adhesion Molecule Expression on Pulmonary Endothelial Cells, Related to Figure 6**  
 Expression of cellular adhesion molecules on pulmonary endothelial cells 48 hr post influenza virus infection in C57BL/6J mice treated with either vehicle or CYM-5442. Data represent average  $\pm$  SEM from 5 mice/group and represents 2 independent experiments.



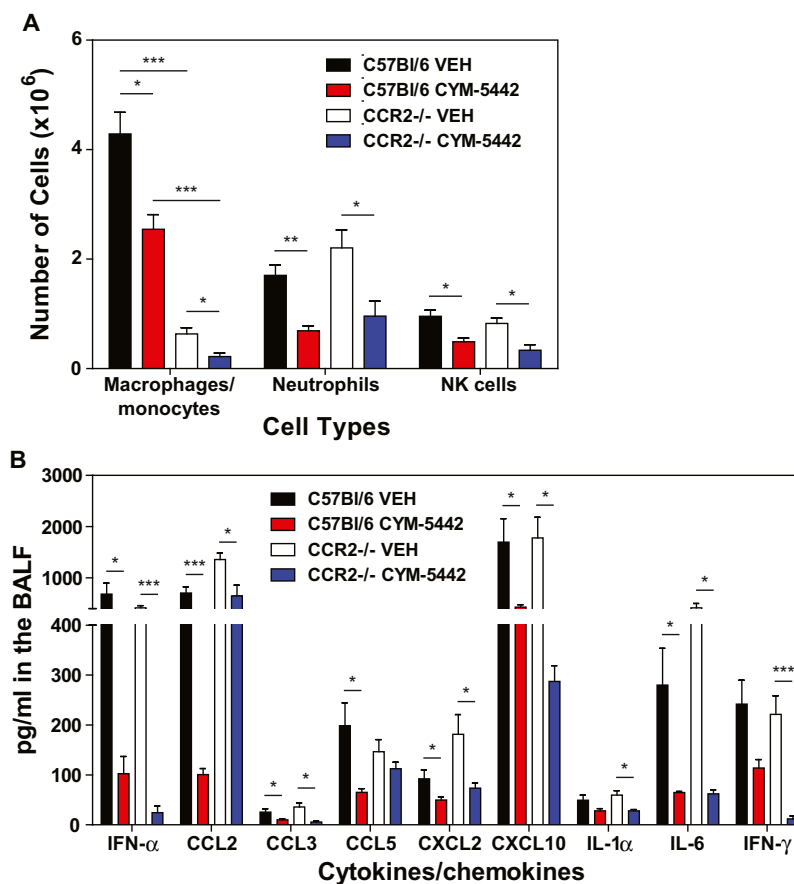

**Figure S7. Inhibition of Inflammatory Macrophage/Monocyte Recruitment Does Not Alter Cytokine/Chemokine Responses following Influenza Virus Infection, Related to Figure 7**

C57Bl/6J or CCR2 receptor deficient mice were infected with  $1 \times 10^4$  PFU of influenza virus and treated with either vehicle or CYM-5442 (2mg/kg 1, 13, 25, and 36 hr post infection).

(A and B) (A) Total numbers of innate immune cells were quantified from lung digests by flow cytometry at 48 hr post-influenza virus infection and (B) pro-inflammatory cytokines and chemokines were measured 48 hr post-infection by ELISA in BALF fluid.

Data represent average  $\pm$  SEM from 5 mice/group. \* $p < 0.05$ ; \*\* $p < 0.005$ ; \*\*\* $p < 0.0005$ . Results are representative of two independent experiments.
